# Supplementary material
Source: publisher site journal article supplement (https://www.spandidos-publications.com/2757/downloadSupplementary)

Figure S1. Representative images of migration and invasion of prostate cancer cells (PC-3 and DU145). (A) Transwell migration images. (B) Transwell invasion images (scale bar, 50  $\mu$ m). miR, microRNA; NC, negative control.

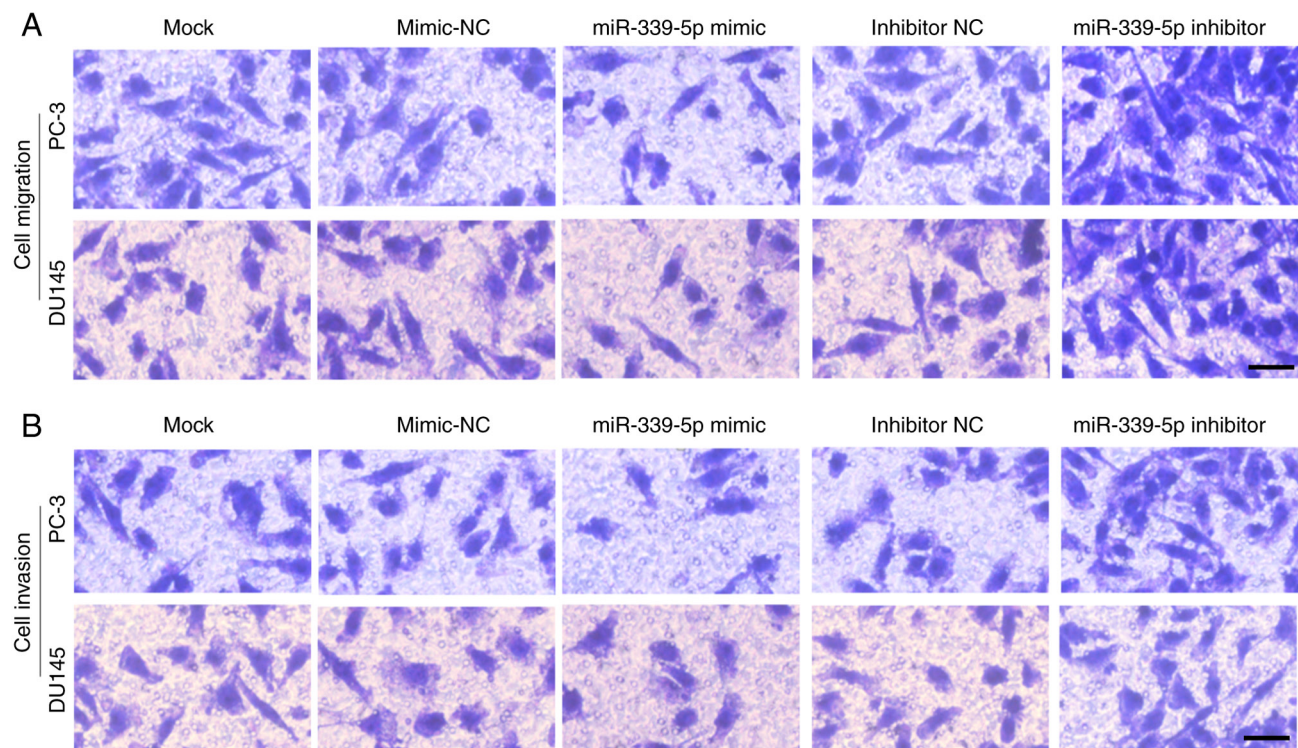

Supplement: Supplementary file 1 [file downloadSupplementary]
